# Supplementary material for: Facile and sensitive detection of influenza viruses using SERS antibody probes
Source: Royal Society of Chemistry journal article supplement (doi:10.1039/c6ra13966c), 2016-01-01
Supplement: c6ra13966c1.pdf [file c6ra13966c1.pdf]

Supporting Information

# **Facile and sensitive detection of influenza viruses using SERS antibody probes**

*Jeong Moon,<sup>a</sup> So Yeon Yi,<sup>a</sup> AhReum Hwang,<sup>a,b</sup> Gayoung Eom,<sup>a,b</sup> Jieun Sim,<sup>a,c,d</sup>  
Jinyoung Jeong,<sup>a,c,d</sup> Eun-Kyung Lim,<sup>a,c,d</sup> Bong Hyun Chung,<sup>a,c,d</sup> Bongsoo Kim,<sup>b</sup>  
Juyeon Jung,<sup>\*,a,c,d</sup> and Taejoon Kang<sup>\*,a,c,d</sup>*

<sup>a</sup>BioNanotechnology Research Center, KRIBB, Daejeon 34141, Korea.

<sup>b</sup>Department of Chemistry, KAIST, Daejeon 34141, Korea.

<sup>c</sup>BioNano Health Guard Research Center, KRIBB, Daejeon 34141, Korea.

<sup>d</sup>Major of Nanobiotechnology and Bioinformatics, UST, Daejeon 34113, Korea.

**Table S1.** Commercial influenza virus assays

| Product                                      | Detection limit                             | Detection method | Time/Complexity |
|----------------------------------------------|---------------------------------------------|------------------|-----------------|
| Cepheid® Xpert Flu Assay                     | 5 TCID <sub>50</sub> /ml                    | PCR              | 1 h/Moderate    |
| Qiagen <i>artus</i> ® Infl A/B RG RT-PCR Kit | $10 \times 10^{0.9}$ TCID <sub>50</sub> /ml | PCR              | ~4 h/High       |
| Simplexa™ Influenza A H1N1 (2009)            | $2.7 \times 10^1$ TCID <sub>50</sub> /ml    | PCR              | <4 h/High       |
| BD Directigen™ EZ Flu A+B                    | $1.86 \times 10^3$ TCID <sub>50</sub> /ml   | Immunoassay      | 15 min/Moderate |
| Quick Vue Influenza A+B test                 | $4.4 \times 10^3$ TCID <sub>50</sub> /ml    | Immunoassay      | 10 min/Easy     |
| Binax NOW Flu A & Flu B                      | $5.63 \times 10^4$ TCID <sub>50</sub> /ml   | Immunoassay      | 15 min/Easy     |

Table S1 shows the representative commercial influenza virus assays. The data was referred from manufacturer's information.<sup>1-6</sup>

**SERS Spectra of Probes Before and After Ag Enhancement.** Figure S1 shows SERS spectra of RBITC before and after Ag enhancement. Although the SERS signals are weak and cannot be reproduced before Ag enhancement, the signals became strong and reproducible after Ag enhancement. The stable and significantly increased SERS signals allowed sensitive and quantitative detection of pH1N1.

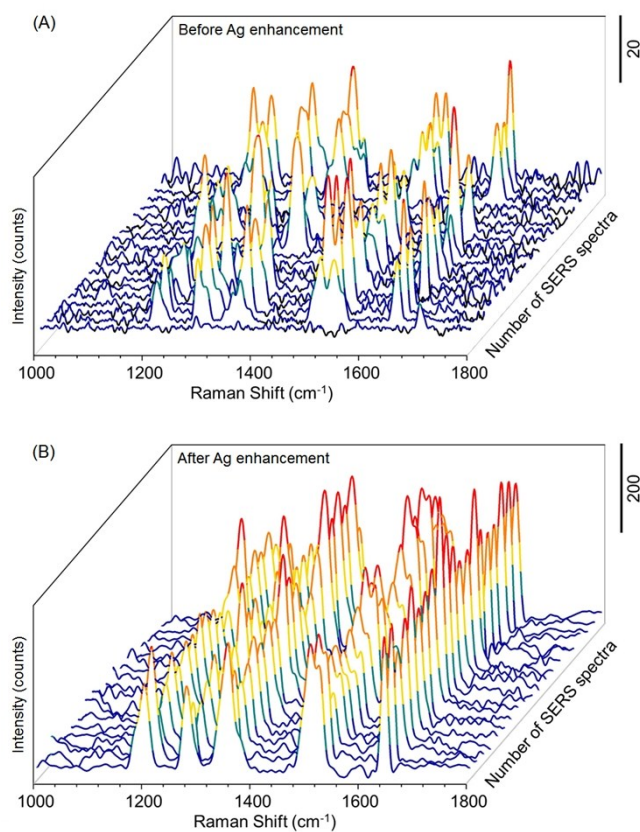

**Figure S1.** Twenty SERS spectra of RBITC (A) before and (B) after Ag enhancement.

## References

1. <http://www.cepheid.com/us/cepheid-solutions/clinical-ivd-tests/critical-infectious-diseases/xpert-flu>
2. <https://www.qiagen.com/fi/shop/detection-solutions/human-pathogens/artus-inflh1-lcrg-rt-pcr-kit-ruo/#orderinginformation>
3. <https://www.focusdx.com/product-catalog/category/us-catalog/simplexa/>
4. <http://www.bd.com/ds/productCenter/256050.asp>
5. <https://www.quidel.com/immunoassays/rapid-influenza-tests/quickvue-influenza-test>
6. <http://www.alere.com/en/home/support/edu/product-demos/binaxnow/binaxnow-influenza-a-b.html>
